# Supplementary material for: Nutritional Peak Week and Competition Day Strategies of Competitive Natural Bodybuilders
Source: PubMed Central journal article supplement (PMC6315482; doi:10.3390/sports6040126), 2018-10-24
Supplement: sports-06-00126-s001.pdf [file sports-06-00126-s001.pdf]

# **Dietary Assessment of a Natural Bodybuilding Population**

**Sheffield  
Hallam  
University**

**Food and Nutrition Group**

**Dr. Andrew Chappell**

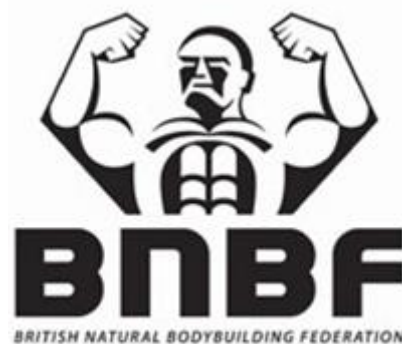

**Questionnaire Number:**

**PLEASE ANSWER ALL QUESTIONS RELATED TO YOUR CONTEST PREPARATION**

If you are unsure about any of the questions then please ask a research for clarification

**Competitor Information**

Competitor Number:\_\_\_\_\_ Competitor Class:\_\_\_\_\_ Age:\_\_\_\_\_

Smoking Status: Smoker, Non Smoker, Smoke During Prep

Year's bodybuilding training:\_\_\_\_\_ Year's competing:\_\_\_\_\_ Competitions this season: \_\_\_\_\_

Weeks dieting for this competition (including qualifier if applicable):\_\_\_\_\_

Current contest weight (kg):\_\_\_\_\_ Weight at start of preparation (kg):\_\_\_\_\_

Height (cm):\_\_\_\_\_ Bodyfat % and the method used to estimate:\_\_\_\_\_

Highest bodybuilding accolade (example: BNBf British Men's open lightweight 3<sup>rd</sup> 2013):

**Fluid Intake**

Typical daily fluid intake (litres):\_\_\_\_\_

Do you use artificial sweeteners? Yes/No Do you use sugar free cordials/squash? Yes/No

Beverage intake during contest preparation, please tick (✓) as appropriate

| <b>Standard Serving: Can of pop 330ml, Cup of tea 150ml, take away coffee 250ml</b> |                        |                 |            |                |                |           |               |               |            |
|-------------------------------------------------------------------------------------|------------------------|-----------------|------------|----------------|----------------|-----------|---------------|---------------|------------|
| Normal serving                                                                      | Less than once a month | 1 - 3 per month | 1 per week | 2 - 4 per week | 5 - 6 per week | 1 per day | 2 - 3 per day | 4 - 5 per day | 6+ per day |
| Coffee                                                                              |                        |                 |            |                |                |           |               |               |            |
| Espresso                                                                            |                        |                 |            |                |                |           |               |               |            |
| Tea                                                                                 |                        |                 |            |                |                |           |               |               |            |
| Herbal tea                                                                          |                        |                 |            |                |                |           |               |               |            |
| Energy drink                                                                        |                        |                 |            |                |                |           |               |               |            |
| Fizzy drinks                                                                        |                        |                 |            |                |                |           |               |               |            |
| Diet fizzy drinks                                                                   |                        |                 |            |                |                |           |               |               |            |
| Alcohol                                                                             |                        |                 |            |                |                |           |               |               |            |

## Supplementation

Supplement intake during contest preparation, please tick (✓) as appropriate

| Supplement                        | please tick<br>(✓) | Brand |
|-----------------------------------|--------------------|-------|
| Multivitamin                      |                    |       |
| Vitamin C                         |                    |       |
| Vitamin D                         |                    |       |
| Mineral supplement                |                    |       |
| Joint supplement                  |                    |       |
| Omega-3/Cod liver oil             |                    |       |
| Protein powder                    |                    |       |
| BCAA                              |                    |       |
| Individual amino acid             |                    |       |
| Carbohydrate supplement           |                    |       |
| Creatine (directly or indirectly) |                    |       |
| Fat burners                       |                    |       |
| Pre-workout supplements           |                    |       |
| Protein/Flapjack Bars             |                    |       |
| Other                             |                    |       |

## Dietary Approach

Which of the following best describes your dietary approach? Circle where appropriate:

|                    |              |                         |             |
|--------------------|--------------|-------------------------|-------------|
| <b>Diet Style:</b> | Clean eating | If it fits your macro's | Cheat meals |
| <b>High:</b>       | Protein      | Carbohydrate            | Fat         |
| <b>Medium:</b>     | Protein      | Carbohydrate            | Fat         |
| <b>Low:</b>        | Protein      | Carbohydrate            | Fat         |

## Competition Diet

In the space below, please record the diet followed (in either portion sizes or grams) at the start, middle and end (not including peak week) of your contest preparation.

| Initial Diet (first few weeks)                                                                                                                                                                                                                                                                                                                                                                                                                                                                                                                                                                                                                                                                          | Middle Diet (halfway phase)                                                                                                                                                                                                                                                                                                                                                                                                                                                                                                                                                                                                                                                                             | End Diet (final weeks)                                                                                                                                                                                                                                                                                                                                                                                                                                                                                                                                                                                                                                                                     |
|---------------------------------------------------------------------------------------------------------------------------------------------------------------------------------------------------------------------------------------------------------------------------------------------------------------------------------------------------------------------------------------------------------------------------------------------------------------------------------------------------------------------------------------------------------------------------------------------------------------------------------------------------------------------------------------------------------|---------------------------------------------------------------------------------------------------------------------------------------------------------------------------------------------------------------------------------------------------------------------------------------------------------------------------------------------------------------------------------------------------------------------------------------------------------------------------------------------------------------------------------------------------------------------------------------------------------------------------------------------------------------------------------------------------------|--------------------------------------------------------------------------------------------------------------------------------------------------------------------------------------------------------------------------------------------------------------------------------------------------------------------------------------------------------------------------------------------------------------------------------------------------------------------------------------------------------------------------------------------------------------------------------------------------------------------------------------------------------------------------------------------|
| <p><b>Example Diet</b><br/> <b>M1:</b> 100g of Weatabix in water, banana, 3 whole boiled eggs, 40g of whey (Extreme Nutrition)<br/> <b>M2:</b> 1 CNP pro flapjack (orange flavour), small apple 70g<br/> <b>M3:</b> 150g of steamed cod, 40g of spinach, 30g of green olives, 200g of boiled white potatoes<br/> <b>M4:</b> Repeat meal 3<br/> <b>M5:</b> Repeat meal 1<br/> <b>Pre Workout:</b> 30g NO Explode Lime flavour (BSN)<br/> <b>Post Exercise:</b> 80g Build and Recover (Extreme Nutrition)<br/> <b>M7:</b> 70g Low Fat Cottage Cheese (Tesco), 35g Pro Peptide (CNP)<br/> <b>Drinks:</b> 3 Cups of instant black coffee with meals (Kenco)<br/>                     1 Can of Pepsi Max</p> | <p><b>Example Diet</b><br/> <b>M1:</b> 50g of Weatabix in water, banana, 3 whole boiled eggs. 40g of whey (Extreme Nutrition)<br/> <b>M2:</b> 1 CNP pro flapjack (orange flavour), small apple 70g<br/> <b>M3:</b> 120g of steamed cod, 40g of spinach, 30g of green olives, 150g of boiled white potatoes<br/> <b>M4:</b> Repeat meal 3<br/> <b>M5:</b> Repeat meal 1<br/> <b>Pre Workout:</b> 30g NO Explode Lime flavour (BSN)<br/> <b>Post Exercise:</b> 60g Build and Recover (Extreme Nutrition)<br/> <b>M7:</b> 60g Low Fat Cottage Cheese (Tesco), 35g Pro Peptide (CNP)<br/> <b>Drinks:</b> 2 Cups of instant black coffee with meals (Kenco)<br/>                     2 Cans of Pepsi Max</p> | <p><b>Example Diet</b><br/> <b>M1:</b> 60g of banana and 6 whole boiled eggs, 50g of whey (Extreme Nutrition)<br/> <b>M2:</b> 1 CNP pro flapjack (orange flavour), small apple 70g<br/> <b>M3:</b> 120g of steamed cod, 40g of spinach, 30g of green olives, 100g of boiled white potatoes<br/> <b>M4:</b> Repeat meal 3<br/> <b>M5:</b> Repeat meal 1<br/> <b>Pre Workout:</b> 30g NO Explode Lime flavour (BSN)<br/> <b>Post Exercise:</b> 50g Build and Recover (Extreme Nutrition)<br/> <b>M7:</b> 50g Low Fat Cottage Cheese (Tesco), 50g Pro Peptide (CNP) 5g<br/> <b>Drinks:</b> 6 Cups of instant black coffee with meals (Kenco)<br/>                     3 Cans of Pepsi Max</p> |
|                                                                                                                                                                                                                                                                                                                                                                                                                                                                                                                                                                                                                                                                                                         |                                                                                                                                                                                                                                                                                                                                                                                                                                                                                                                                                                                                                                                                                                         | (more space available on the next page)                                                                                                                                                                                                                                                                                                                                                                                                                                                                                                                                                                                                                                                    |

|  |  |  |
|--|--|--|
|  |  |  |
|--|--|--|

## Peaking Strategies

Please tick (✓) and provide additional detail where appropriate

| Peaking Strategy                     | please tick<br>(✓) | Details (food types and number of days etc.) |
|--------------------------------------|--------------------|----------------------------------------------|
| No Peaking Strategy,<br>Regular Diet |                    |                                              |
| Carbohydrate depletion               |                    |                                              |
| Carbohydrate loading                 |                    |                                              |
| Water loading                        |                    |                                              |
| Water depleting                      |                    |                                              |
| Sodium loading                       |                    |                                              |
| Sodium depleting                     |                    |                                              |
| Vitamin C or Citrus loading          |                    |                                              |
| Other                                |                    |                                              |

## Contest Day Plan

Please tick (✓) and provide additional detail where appropriate

| Contest day strategy                      | please tick<br>(✓) | Details (food types, brands used etc.) |
|-------------------------------------------|--------------------|----------------------------------------|
| High GI/ sugary<br>carbohydrate pre stage |                    |                                        |
| Carbohydrate loading                      |                    |                                        |
| Fat loading                               |                    |                                        |
| Protein loading                           |                    |                                        |
| Regular diet                              |                    |                                        |
| use of alcohol                            |                    |                                        |
| use of sodium or salt foods               |                    |                                        |
| Water depleting                           |                    |                                        |
| Minimal fibre                             |                    |                                        |
| Other                                     |                    |                                        |

# Resistance Training Programme

Please circle as appropriate

## Resistance training at the Start of contest preparation (first few weeks)

|                                                     |   |   |   |   |   |   |    |    |
|-----------------------------------------------------|---|---|---|---|---|---|----|----|
| Number of resistance training sessions per week:    | 1 | 2 | 3 | 4 | 5 | 6 | 7+ |    |
| Number of chest, sessions per week:                 | 1 | 2 | 3 | 4 | 5 | 6 | 7+ |    |
| Number of back training sessions per week:          | 1 | 2 | 3 | 4 | 5 | 6 | 7+ |    |
| Number of quadriceps training sessions per week:    | 1 | 2 | 3 | 4 | 5 | 6 | 7+ |    |
| Number of exercises for chest, back or quads:       | 1 | 2 | 3 | 4 | 5 | 6 | 7+ |    |
| Typical sets per exercise for chest, back or quads: | 1 | 2 | 3 | 4 | 5 | 6 | 7+ |    |
| Number of sets between 1 - 5 repetitions:           | 0 | 1 | 2 | 3 | 4 | 5 | 6  | 7+ |
| Number of sets above 13 repetitions:                | 0 | 1 | 2 | 3 | 4 | 5 | 6  | 7+ |

## Resistance training in the Middle of contest preparation (halfway phase)

|                                                     |   |   |   |   |   |   |    |    |
|-----------------------------------------------------|---|---|---|---|---|---|----|----|
| Number of resistance training sessions per week:    | 1 | 2 | 3 | 4 | 5 | 6 | 7+ |    |
| Number of chest, sessions per week:                 | 1 | 2 | 3 | 4 | 5 | 6 | 7+ |    |
| Number of back training sessions per week:          | 1 | 2 | 3 | 4 | 5 | 6 | 7+ |    |
| Number of quadriceps training sessions per week:    | 1 | 2 | 3 | 4 | 5 | 6 | 7+ |    |
| Number of exercises for chest, back or quads:       | 1 | 2 | 3 | 4 | 5 | 6 | 7+ |    |
| Typical sets per exercise for chest, back or quads: | 1 | 2 | 3 | 4 | 5 | 6 | 7+ |    |
| Number of sets between 1 - 5 repetitions:           | 0 | 1 | 2 | 3 | 4 | 5 | 6  | 7+ |
| Number of sets above 13 repetitions:                | 0 | 1 | 2 | 3 | 4 | 5 | 6  | 7+ |

## Resistance training at the End of contest preparation (final weeks)

|                                                     |   |   |   |   |   |   |    |    |
|-----------------------------------------------------|---|---|---|---|---|---|----|----|
| Number of resistance training sessions per week:    | 1 | 2 | 3 | 4 | 5 | 6 | 7+ |    |
| Number of chest, sessions per week:                 | 1 | 2 | 3 | 4 | 5 | 6 | 7+ |    |
| Number of back training sessions per week:          | 1 | 2 | 3 | 4 | 5 | 6 | 7+ |    |
| Number of quadriceps training sessions per week:    | 1 | 2 | 3 | 4 | 5 | 6 | 7+ |    |
| Number of exercises for chest, back or quads:       | 1 | 2 | 3 | 4 | 5 | 6 | 7+ |    |
| Typical sets per exercise for chest, back or quads: | 1 | 2 | 3 | 4 | 5 | 6 | 7+ |    |
| Number of sets between 1 - 5 repetitions:           | 0 | 1 | 2 | 3 | 4 | 5 | 6  | 7+ |
| Number of sets above 13 repetitions:                | 0 | 1 | 2 | 3 | 4 | 5 | 6  | 7+ |

# Cardiovascular Training Programme

## Start of contest preparation (first few weeks)

Did you engage in fasted cardio? Yes/ No

Number of high intensity interval training (HIIT) or steady state cardio performed per week?

HIIT: 0 1 2 3 4 5 6 7 8 Other: \_\_\_\_\_

Duration any additional information: \_\_\_\_\_

Stead State: 0 1 2 3 4 5 6 7 8 Other: \_\_\_\_\_

Duration any additional information: \_\_\_\_\_

Habitual cardio sessions, e.g walking to and from work or occupational cardio

Number of sessions: 0 1 2 3 4 5 6 7 8 Other: \_\_\_\_\_

Duration and additional information: \_\_\_\_\_

## Middle of contest preparation (halfway phase)

Did you engage in fasted cardio? Yes/ No

Number of high intensity interval training (HIIT) or steady state cardio performed per week?

HIIT: 0 1 2 3 4 5 6 7 8 Other: \_\_\_\_\_

Duration any additional information: \_\_\_\_\_

Stead State: 0 1 2 3 4 5 6 7 8 Other: \_\_\_\_\_

Duration any additional information: \_\_\_\_\_

Habitual cardio sessions, e.g walking to and from work or occupational cardio

Number of sessions: 0 1 2 3 4 5 6 7 8 Other: \_\_\_\_\_

Duration and additional information: \_\_\_\_\_

## End of contest preparation (final weeks)

Did you engage in fasted cardio? Yes/ No

Number of high intensity interval training (HIIT) or steady state cardio performed per week?

HIIT: 0 1 2 3 4 5 6 7 8 Other: \_\_\_\_\_

Duration any additional information: \_\_\_\_\_

Stead State: 0 1 2 3 4 5 6 7 8 Other: \_\_\_\_\_

Duration any additional information: \_\_\_\_\_

Habitual cardio sessions, e.g walking to and from work or occupational cardio

Number of sessions: 0 1 2 3 4 5 6 7 8 Other: \_\_\_\_\_

Duration and additional information: \_\_\_\_\_

## End of Questionnaire



**[Blank Page]**
